# Supplementary material for: New Fellow Proficiency and Program Director Expectations in Primary Care Sports Medicine
Source: Research Square preprint supplement (doi:10.21203/rs.3.rs-8152681/v1), 2025-12-30
Supplement: Supplementary file 1 [file 5208259ef4f55556e8280b1d.docx]

**Full Survey (Annex)**

Demographics:

Are you a current Program Director for an ACGME-accredited Primary Care Sports Medicine fellowship?

What is your primary specialty?

Through which department is the fellowship program sponsored?

In what year did you complete your training and start practicing independently?

How long have you been Program Director? Please include time served as Program Director in other PCSM fellowship programs.

Approximately how old is your current fellowship program?

How many fellows does your program currently have?

What is the primary specialty of your fellow(s)?

Questions in Survey

- First question in each category is a Likert scale of strongly disagree to strongly agree
- Second question in each category is a Likert scale of no proficiency to complete proficiency

Primary specialty:

The new fellow demonstrates ability to practice unsupervised in his or her primary specialty.

What is your minimal acceptable level of proficiency in a new fellow’s ability to practice unsupervised in his or her primary specialty?

Billing and Coding:

The new fellow is knowledgeable in billing and coding.

What is your minimal acceptable level of proficiency in a new fellow’s knowledge in billing and coding?

History:

The new fellow is able to obtain an appropriate history, as it pertains to sports medicine.

What is your minimal acceptable level of proficiency in fellow’s ability to obtain an appropriate history, as it pertains to sports medicine?

Physical Exam Non-MSK:

The new fellow is able to perform an appropriate non-musculoskeletal physical examination, as it pertains to sports medicine?

What is your minimal acceptable level of proficiency in a new fellow’s ability to perform an appropriate non-musculoskeletal physical examination?

Physical Exam MSK:

The new fellow is proficient in performing a musculoskeletal examination, including the identification of anatomic landmarks.

What is your minimal acceptable level of proficiency in a new fellow’s ability to perform a musculoskeletal examination, including the identification of anatomic landmarks?

Assessment and plan:

The new fellow is able to independently formulate an assessment and plan, as it pertains to sports medicine.

What is your minimal acceptable level of proficiency in a new fellow’s ability to independently formulate an assessment and plan, as it pertains to sports medicine?

Medical Management:

The new fellow is proficient in managing non-musculoskeletal conditions relevant to sports medicine. Examples include rash and infectious mononucleosis.

What is your minimal acceptable level of proficiency in a new fellow’s ability to manage non-musculoskeletal conditions?

Systems based practice:

The new fellow demonstrates competence in systems-based practice.

What is your minimal acceptable level of proficiency in a new fellow’s competence in systems-based practice?

Non-Emergent:

The new fellow is able to manage common non-emergent injuries at sporting events.

What is your minimal acceptable level of proficiency in a new fellow’s ability to manage common non-emergent injuries at sporting events?

Emergent:

The new fellow is able to manage emergent injuries and conditions at sporting events, at the level expected of a sideline physician.

What is your minimal acceptable level of proficiency in a new fellow’s ability to manage emergent injuries and conditions at sporting events, at the level expected of a sideline physician

Landmark injections:

The new fellow is proficient in landmark based injections.

What is your minimal acceptable level of proficiency in a new fellow’s proficiency in landmark based injections?

US theory:

The new fellow is proficient in the basic theoretic principles of sports ultrasound, including understanding the sonographic appearance of normal and pathologic tissues.

What is your minimal acceptable level of proficiency in a new fellow’s knowledge of the basic theoretic principles of sports ultrasound, including understanding the sonographic appearance of normal and pathologic tissues?

US practical:

The new fellow is proficient in the basic practical principles of sports ultrasound, and is able to visualize and identify normal anatomic structures.

What is your minimal acceptable level of proficiency in a new fellow’s knowledge in the basic practical principles of sports ultrasound, and is able to visualize and identify normal anatomic structures?

Interprofessional team:

The new fellow works effectively within an interprofessional team, including physical therapists and athletic trainers.

What is your minimal acceptable level of proficiency in a new fellow’s ability to work effectively within an interprofessional team, including physical therapists and athletic trainers?

XRAY:

The new fellow is able to perform an independent interpretation of musculoskeletal x-rays.

What is your minimal acceptable level of proficiency in a new proficiency in fellow's ability to perform an independent interpretation of musculoskeletal x-rays?

MRI:

The new fellow is able to perform an independent interpretation of musculoskeletal MRIs.

What is your minimal acceptable level of proficiency in a new fellow’s ability to perform an independent interpretation of musculoskeletal MRIs?

Self-Knowledge:

The new fellow is able to identify strengths, deficiencies, and limits in his/her knowledge and expertise.

What is your minimal acceptable level of proficiency in a new fellow’s ability to identify strengths, deficiencies, and limits in his/her knowledge and expertise?

Evidence:

The new fellow can locate, appraise, and assimilate evidence from scientific studies related to the patients’ health problems.

What is your minimal acceptable level of proficiency in a new fellow’s ability to locate, appraise, and assimilate evidence from scientific studies related to the patients’ health problems?

Academic Interest:

The new fellow has a genuine interest in academic projects.

What is your minimal acceptable level of interest of a new fellow’s in academic projects?

Initiative in research

The new fellow displays self-initiative in conducting clinical research.

What is your minimal acceptable level of proficiency in a new fellow’s self-initiative in conducting clinical research?

Research writing:

The new fellow has a good grasp on the fundamentals of preparing an abstract or manuscript.

What is your minimal acceptable level of proficiency in a new fellow’s grasp on the fundamentals of preparing an abstract or manuscript?
